# Supplementary material for: Prognostic Stratification of Patients with Burkitt Lymphoma Using Serum β2-microglobulin Levels
Source: PubMed Central journal article supplement — Cancer Res Treat. 2020 Dec 17;53(3):847–56. doi: 10.4143/crt.2020.1060 (PMC8291169; doi:10.4143/crt.2020.1060), 2020-12-17
Supplement: crt-2020-1060-suppl1.pdf [file crt-2020-1060-suppl1.pdf]

**S1 Table.** Treatment regimens according to the risk group

| Variable   | Low-risk group<br>(n=16) | High-risk group<br>(n=65) | p-value |
|------------|--------------------------|---------------------------|---------|
| B-NHL      | 8 (50.0)                 | 29 (44.6)                 | 0.239   |
| DA-EPOCH-R | 5 (31.2)                 | 11 (16.9)                 |         |
| HyperCVAD  | 3 (18.8)                 | 25 (38.5)                 |         |

Values are presented as number (%). B-NHL, cyclophosphamide and prednisone followed by cycles containing ifosfamide; high-dose methotrexate, vincristine, dexamethasone, and either doxorubicin or etoposide/cytarabine; or intrathecal triple therapy; DA-EPOCH-R, dose-adjusted infusional etoposide, doxorubicin, and vincristine with prednisone, cyclophosphamide, and rituximab; HyperCVAD, hyper-fractionated cyclophosphamide, vincristine, doxorubicin, and dexamethasone with rituximab or without rituximab.
